# Supplementary material for: Enhanced photocatalytic activity of anatase by the rational modification of the {001} facets with Fe(iii) ions
Source: Royal Society of Chemistry journal article supplement (doi:10.1039/c9nj05134a), 2019-12-13
Supplement: c9nj05134a1.pdf [file c9nj05134a1.pdf]

# Electronic Supplementary Information

## Enhanced photocatalytic activity of anatase by rational modification of {001} facets with Fe(III) ions

Na Guo,<sup>‡ a,b</sup> Lei Sun,<sup>‡ a</sup> Haiyan Li,<sup>a</sup> Ying Zeng,<sup>a,b</sup> Hongwen Yu,<sup>\*a</sup>

a Northeast Institute of Geography and Agroecology, Chinese Academy of Sciences, 4888 Shengbei Rd,  
Changchun 130102, China

b University of Chinese Academy of Sciences, Beijing, 100049, China

*\*To whom correspondence should be addressed. E-mails: yuhw@iga.ac.cn*

## Experimental results

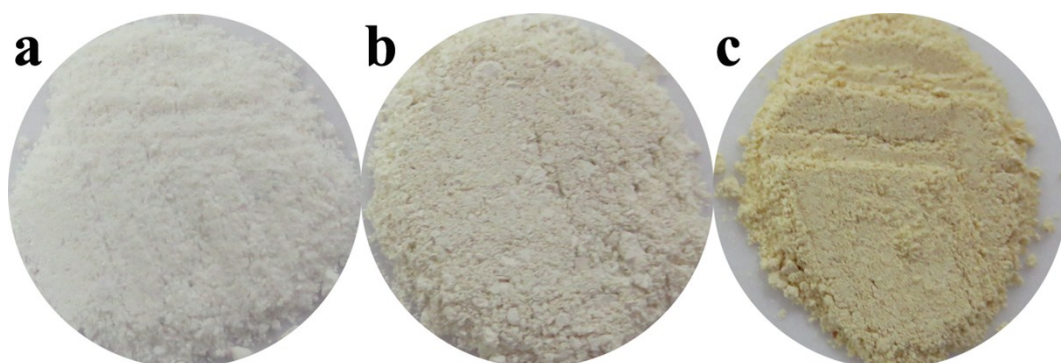

**Figure S1.** Photographs of (a) TiO<sub>2</sub>-80%, (b) Fe-0.5-TiO<sub>2</sub>, (c) and Fe-5-TiO<sub>2</sub>.

Percentage of {001} facets was calculated as follows, which is refer to our previous study and other authoritative references.<sup>1-3</sup> According to the value of **Table S1** and following equations, S<sub>001</sub>%≈80%

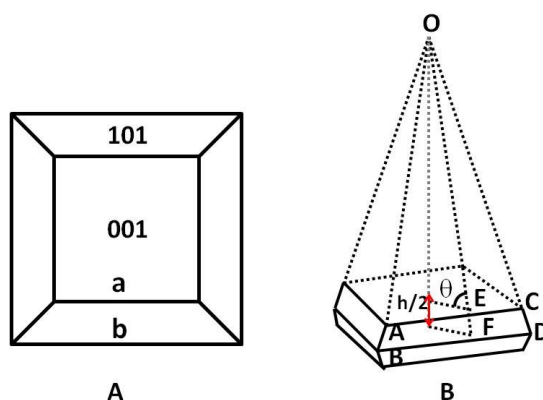

**Figure S2.** (A) The planform of anatase TiO<sub>2</sub> nanosheet. (B) Equilibrium model of anatase TiO<sub>2</sub> crystal.

**Equations:**

$$\begin{aligned}
 S_{001} &= 2a^2 \\
 S_{101} &= 8(S_{OBD} - S_{OAC}) \\
 &= 8\left(\frac{1}{2}OF \cdot BD - \frac{1}{2}OE \cdot AC\right) \\
 &= 8\left(\frac{1}{2} \times \frac{1}{2}b \times b - \frac{1}{2} \times \frac{1}{2}a \times a\right) \\
 &= \frac{2(b^2 - a^2)}{\cos \theta} \\
 S_{001} \% &= \frac{S_{001}}{S_{001} + S_{101}} \\
 &= \frac{2a^2}{2a^2 + \frac{2(b^2 - a^2)}{\cos \theta}} \\
 &= \frac{1}{1 + \frac{(b^2 - a^2)}{a^2 \cos \theta}} \\
 &= \frac{1}{\cos \theta + \left(\frac{a}{b}\right)^{-2} - 1}
 \end{aligned}$$

Where  $a = b - h/\tan \theta$ . The values of  $b$  and  $h$  were determined as showed as TEM image,  $\theta$  is the theoretical value for the angle between the {101} and {001} facets of

anatase,  $68.3^\circ$ . As indicated in the planform, two parameter  $a$  and  $b$  denote lengths of the side of square  $\{001\}$  ‘truncation’ facets and the side of bipyramid. The ratio of  $\{001\}$  facets to total surface area can be described by the value of  $S_{001}/S$  or  $a/b$  ( $0 \leq a/b \leq 1$ ).

**Table S1. Physical Properties of Different Samples**

| sample                  | phase | b (nm) <sup>[a]</sup> | h (nm) <sup>[a]</sup> | $S_{001}$ % | BET (m <sup>2</sup> /g) |
|-------------------------|-------|-----------------------|-----------------------|-------------|-------------------------|
| TiO <sub>2</sub> -80%   | A     | 80-90                 | 7-9                   | ~80         | 89                      |
| TiO <sub>2</sub> -60%   | A     | 30-40                 | 6-8                   | ~60         | 87                      |
| Fe-0.5-TiO <sub>2</sub> | A     | 80-90                 | 7-9                   | ~80         | 95                      |
| P25                     | A, R  | 25                    | -                     | -           | 90                      |

[a] b and h: side length and thickness of TiO<sub>2</sub>-60% nanosheets, respectively, are estimated by TEM image analysis (Figure S4).

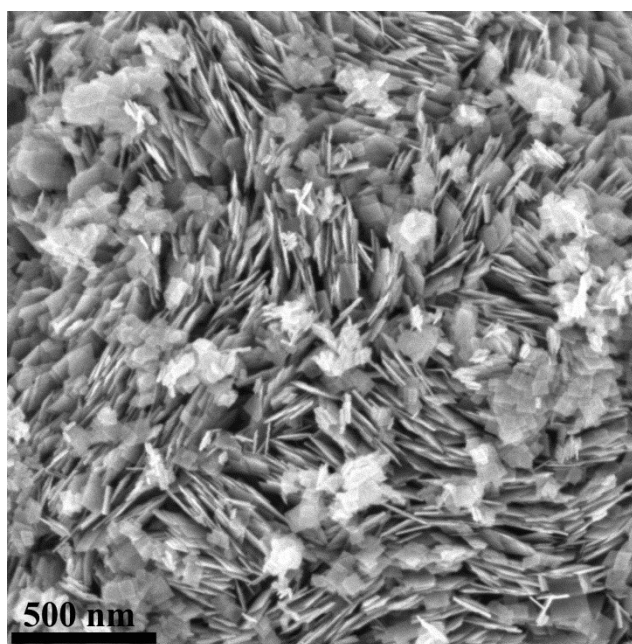

**Figure S3.** SEM image of Fe-0.5-TiO<sub>2</sub>.

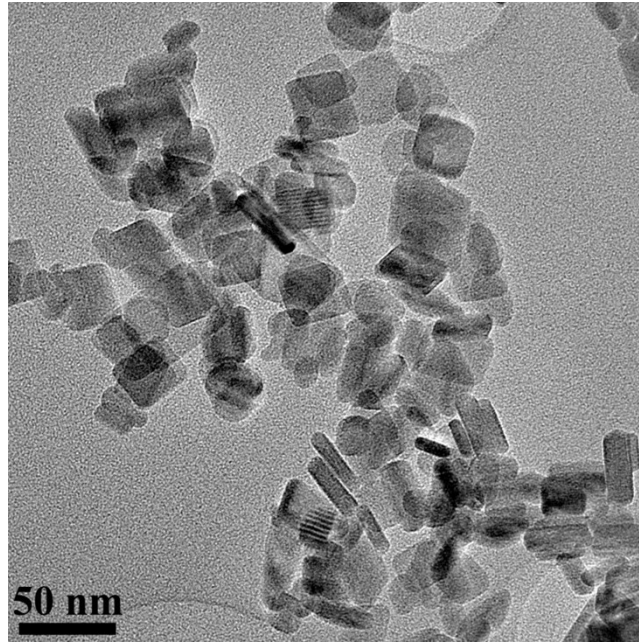

**Figure S4.** TEM image of TiO<sub>2</sub>-60%.

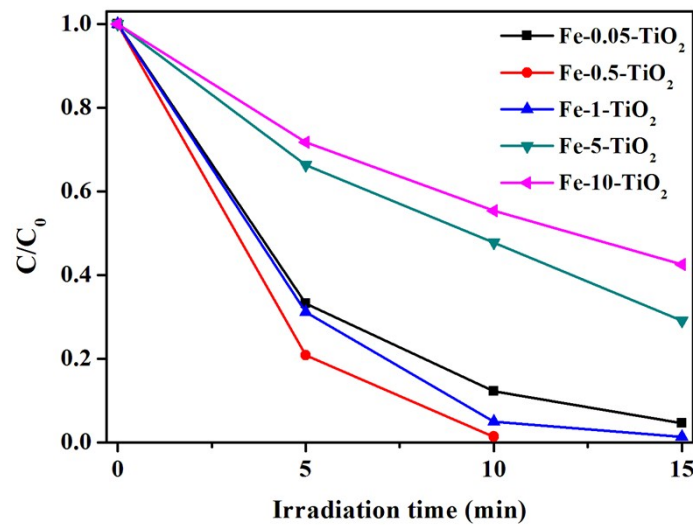

**Figure S5.** Photocatalytic degradation of MO under UV-light irradiation (200-400 nm, 310 mW/cm<sup>2</sup>) over Fe-X-TiO<sub>2</sub> (X = Fe/TiO<sub>2</sub> wt%).

In order to compare the photocatalytic activity between the Fe-0.5-TiO<sub>2</sub> and noble metal-modified anatase TiO<sub>2</sub>, TiO<sub>2</sub>-Pt<sub>0.5</sub> was prepared according to our previous study.<sup>4</sup> And the photocatalytic activity was estimated by degradation of MO under simulate solar-light illumination. The result was shown in **Figure S6**. It can be seen that, TiO<sub>2</sub>-Pt<sub>0.5</sub> shows high photocatalytic efficiency than that of Fe-0.5-TiO<sub>2</sub>. The MO was completely degraded within 20 min with the degradation rate of 100%.

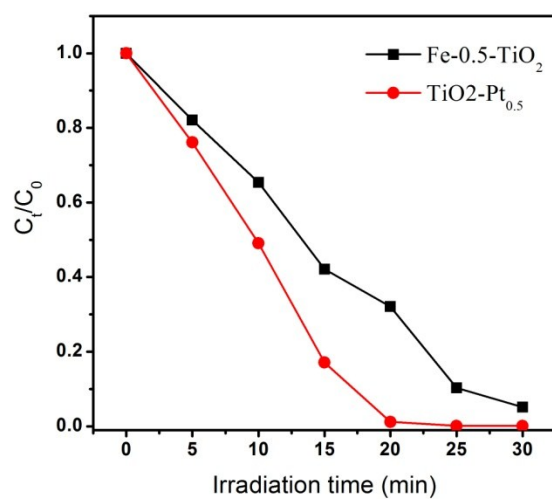

**Figure S6.** The photocatalytic activity of Fe-0.5-TiO<sub>2</sub> and TiO<sub>2</sub>-Pt<sub>0.5</sub>

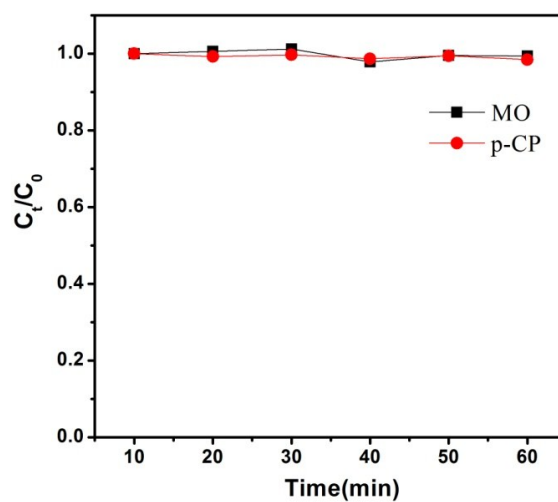

**Figure S7.** Adsorption capability of Fe-0.5-TiO<sub>2</sub> towards MO and p-CP within 1h in dark.

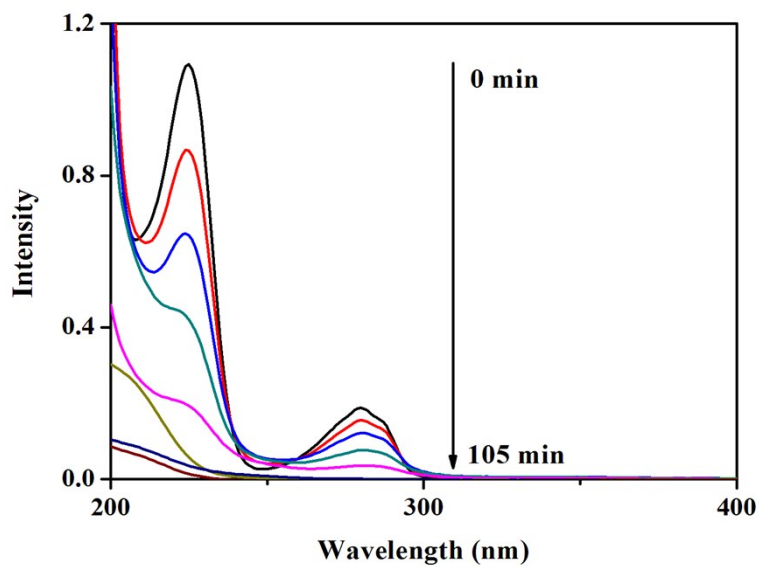

**Figure S8.** (a) UV-vis spectra variation of the p-CP solution under simulated solar-light irradiation (200 mW/cm<sup>2</sup>) over Fe-0.5-TiO<sub>2</sub>.

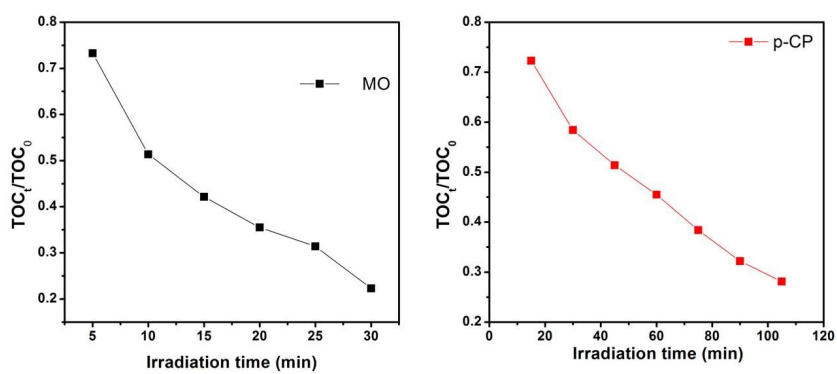

**Figure S9** The content of TOC in each system.

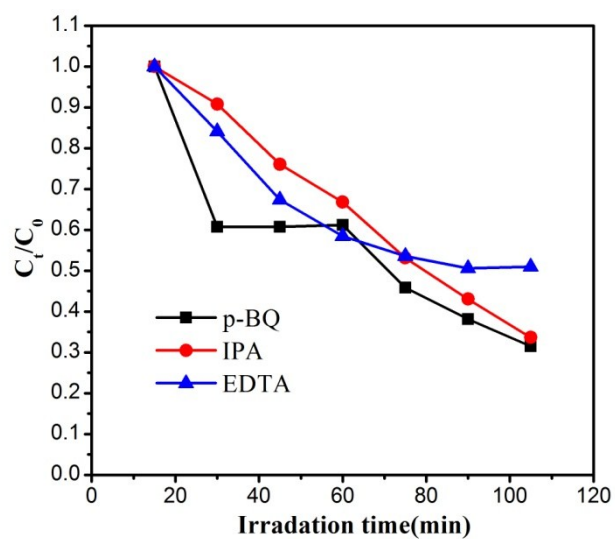

**Figure S10.** Photocatalytic activity of Fe-0.5-TiO<sub>2</sub> towards MO degradation in the presence of different scavengers.

#### References:

1. L. Sun, Z. Zhao, Y. Zhou and L. Liu, *Nanoscale*, 2012, **4**, 613-620.
2. H. G. Yang, C. H. Sun, S. Z. Qiao, J. Zou, G. Liu, S. C. Smith, H. M. Cheng and G. Q. Lu, *Nature*, 2008, **453**, 638-641.
3. Q. Xiang, J. Yu and M. Jaroniec, *Chemical Communications*, 2011, **47**, 4532-4534.
4. N. Guo, Y. Zeng, H. Li, X. Xu and H. Yu, *Materials Letters*, 2018, **221**, 183-186.
